# Supplementary material
Source: PubMed Central journal article supplement (PMC8536321)
Supplement: pnas.2107210118.sapp.pdf [file pnas.2107210118.sapp.pdf]

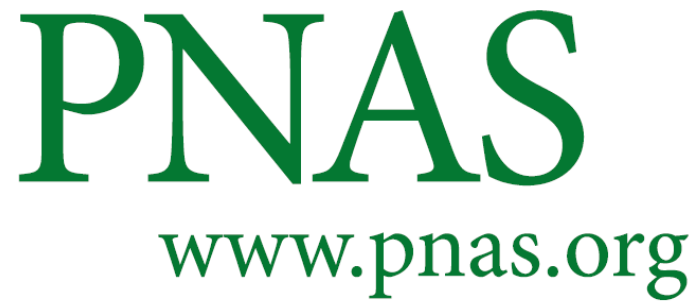

## Supplementary Information for

**FtsA acts through FtsW to promote cell wall synthesis during cell division in *E. coli***

Kyung-Tae Park, Sebastien Pichoff, Shishen Du and Joe Lutkenhaus

Joe Lutkenhaus

Email: [jlutkenh@kumc.edu](mailto:jlutkenh@kumc.edu)

**This PDF file includes:**

Figures S1 to S14  
Tables S1 to S4  
SI References

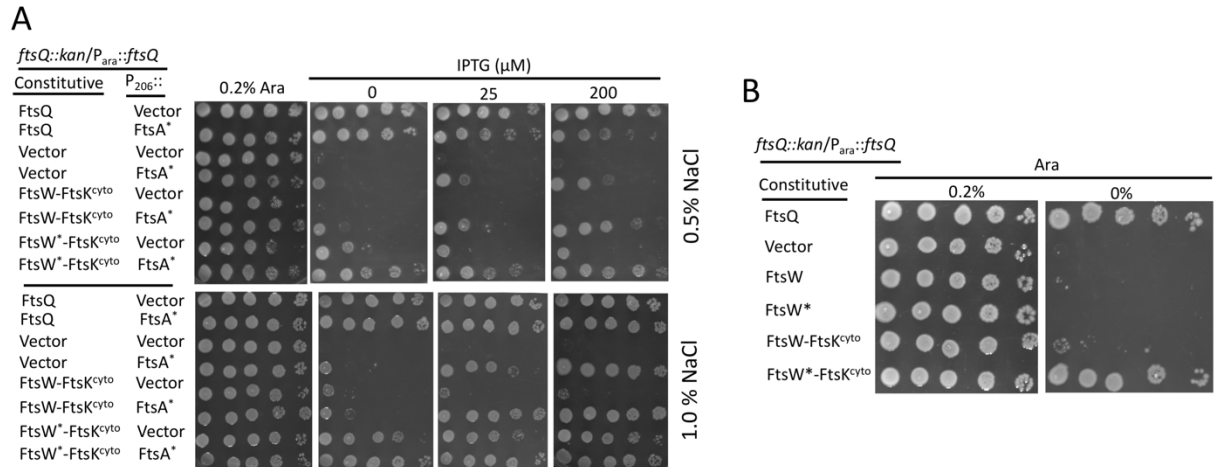

Fig. S1. Testing different conditions for suppression of *ftsQ*. (A) Effect of NaCl concentration on the suppression of the depletion of *ftsQ*. The spot tests were done on LB plates containing 0.5% or 1.0% NaCl in the absence of arabinose (to deplete *ftsQ*) and increasing concentrations of IPTG to induce *ftsA*\*. Plasmid combinations were introduced into PK3116 (*ftsQ14::kan/pBAD33-ftsQ*) to see if they allowed growth in the absence of arabinose. The plasmids included pSEB468 ( $P_{\text{syn135}}::ftsQ$ ), pND16 ( $P_{\text{ftsK}}::ftsW-ftsK^{\text{cyto}}$ ), pND16\* ( $P_{\text{ftsK}}::ftsW*-ftsK^{\text{cyto}}$ ), pSEB306\* ( $P_{206}::ftsA^*$ ) and vector controls. The constructs contained on pGB2 (*ftsQ* and *ftsW-ftsK<sup>cyto</sup>*) are constitutively expressed whereas *ftsA*\* was inducible with IPTG. (B) *ftsW*\* must be fused to *ftsK<sup>cyto</sup>* to suppress *ftsQ* depletion in the absence of *ftsA*\*. PK3116 (*ftsQ14::kan/pBAD33-ftsQ*) containing the following plasmids that constitutively expressed various genes included: pSEB468 ( $P_{\text{syn135}}::ftsQ$ ), pSD257 ( $P_{\text{syn135}} \text{ repA}^{\text{ts}}::ftsW$ ), pSD257\* ( $P_{\text{syn135}} \text{ repA}^{\text{ts}}::ftsW^{\text{M269I}}$ ), pND16 ( $P_{\text{ftsK}}::ftsW-ftsK^{\text{cyto}}$ ), pND16\* ( $P_{\text{ftsK}}::ftsW*-ftsK^{\text{cyto}}$ ) or vector controls were incubated in the absence of arabinose (to deplete *ftsQ*) at 30°C on LB plates with 1% NaCl and increasing concentrations of IPTG.

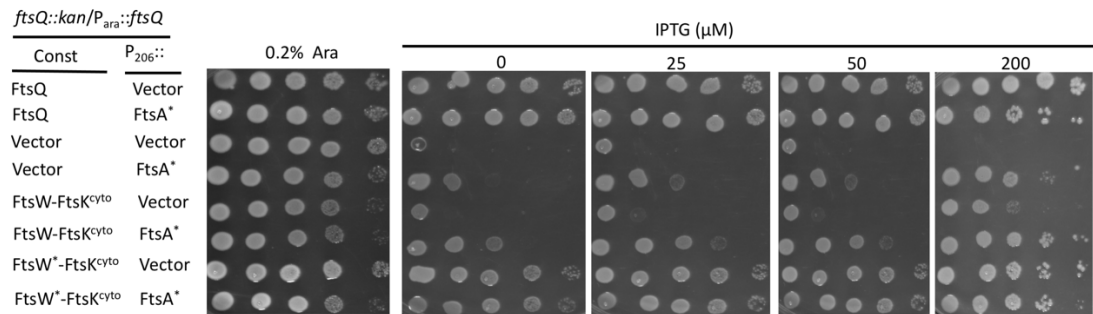

Fig. S2. Suppression of *ftsQ* depletion in MC4100. A) Testing conditions that allow depletion of *ftsQ* in MC4100. Spot tests of JOE417 (MC4100 *ftsQ::kan/pBAD33-ftsQ*) containing pND16 ( $P_{ftsK}::ftsW-ftsK^{cyto}$ ) or pSEB468 ( $P_{syn135}::ftsQ$ ) and pSEB306\* ( $P_{206}::ftsA^*$ ) or vector controls were incubated in the absence of arabinose (to deplete *ftsQ*) at 30°C on LB plates with 1% NaCl and increasing concentrations of IPTG. The constructs contained on pGB2 (*ftsQ* and *ftsW-ftsK<sup>cyto</sup>*) are constitutively expressed whereas *ftsA<sup>\*</sup>* was inducible with IPTG ( $P_{206}::$ ).

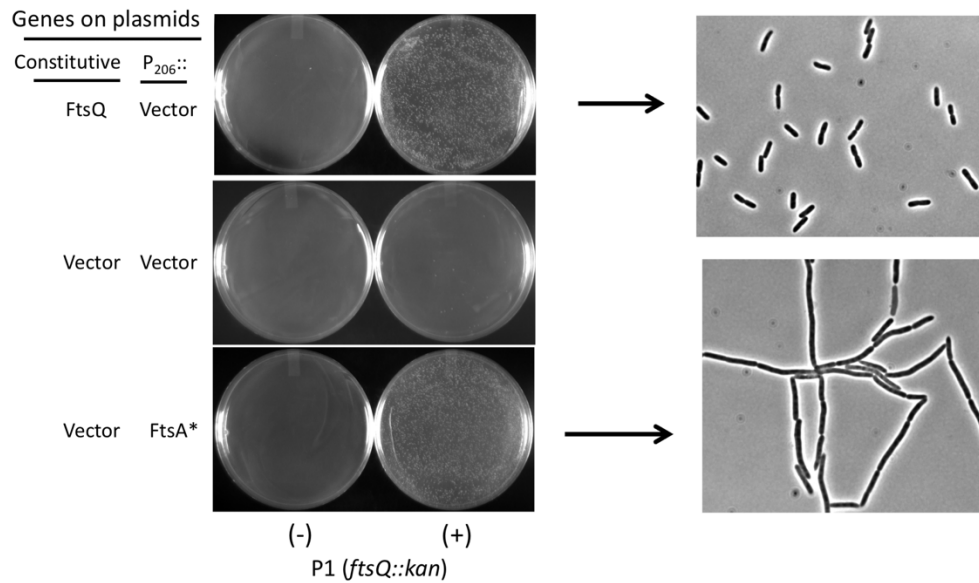

Fig. S3. Deletion of *ftsQ* in the presence of *ftsA\**. P1 grown on JOE417 (*ftsQ14::kan/pBAD33-ftsQ*) was used to transduce W3110 to kanamycin resistance. W3110 contained a plasmid constitutively expressing *ftsQ* (pSEB468 [P<sub>syn135</sub>::*ftsQ*]), a plasmid expressing *ftsA\** under an IPTG-inducible promoter (pSEB306\* [P<sub>206</sub>::*ftsA\**]) or a vector. The experiment is similar to that in Fig. 3. The plates included 200 μM IPTG and were incubated for 2 days at 30°C. The panel on the right contains cells taken from liquid cultures grown under the same conditions. In general, cells observed directly from LB plates displayed less elongated and shorter chaining phenotypes than those from liquid cultures.

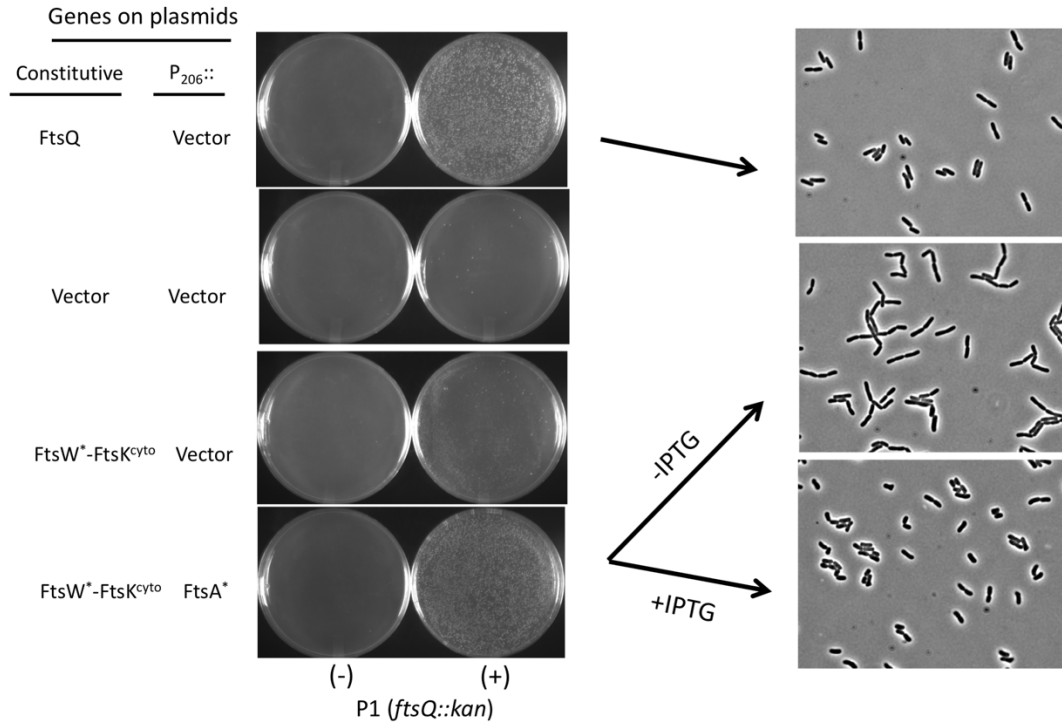

Fig. S4. Deletion of *ftsQ* in the presence of *ftsA*\* and *ftsW*\*-*ftsK*<sup>cyto</sup> in MC4100. P1 prepared on JOE417 (*ftsQ14*::*kan*/pBAD33-*ftsQ*) was used to transduce MC4100 carrying various plasmids to kanamycin resistance. The plasmids were pSEB468 (P<sub>syn135</sub>::*ftsQ*) or pND16\* (P<sub>ftsK</sub>::*ftsW*\*-*ftsK*<sup>cyto</sup>) and pSEB306\* (P<sub>206</sub>::*ftsA*\*) or a vector. Kanamycin resistant transductants were selected at 30°C on plates containing 200 μM IPTG and appropriate antibiotics. Colonies from the top and bottom rows were re-streaked and grown in liquid culture of the same composition. An exponential culture of a transductant obtained with plasmids containing *ftsW*\*-*ftsK*<sup>cyto</sup> and *ftsA*\* was centrifuged, washed and resuspended in LB with or without IPTG. Samples were taken two hours later for photography. Colonies arose on plates expressing just *ftsW*\*-*ftsK*<sup>cyto</sup> but grew slower and varied in size and were not studied.

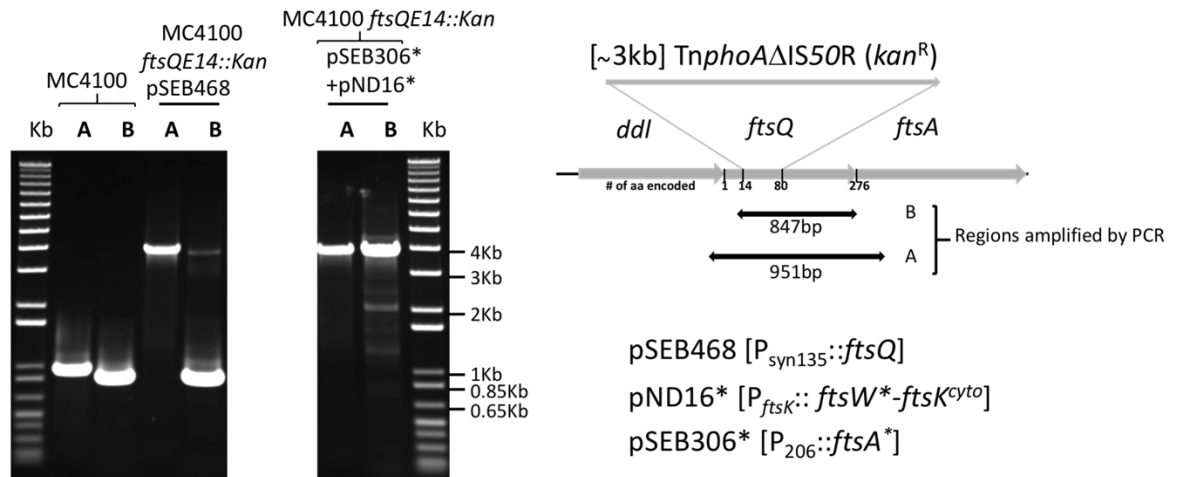

Fig. S5. Confirmation of the deletion of *ftsQ* by PCR. Genomic DNAs were isolated from MC4100 and transductants obtained in Fig. S4 (MC4100 *ftsQ14::kan*/pSEB468 [ $P_{syn135}::ftsQ$ ] and MC4100 *ftsQ14::kan*/pND16\* [ $P_{ftsK}::ftsW^*-ftsK^{cyto}$ ] + pSEB306\* [ $P_{206}::ftsA^*$ ]) and subjected to PCR analysis using two sets of primers as detailed in *Materials and Methods*. One set is internal to *ftsQ* and the other set flanks the *ftsQ* gene. The presence of the *ftsQ14::kan* allele yields a band of ~4 kb.

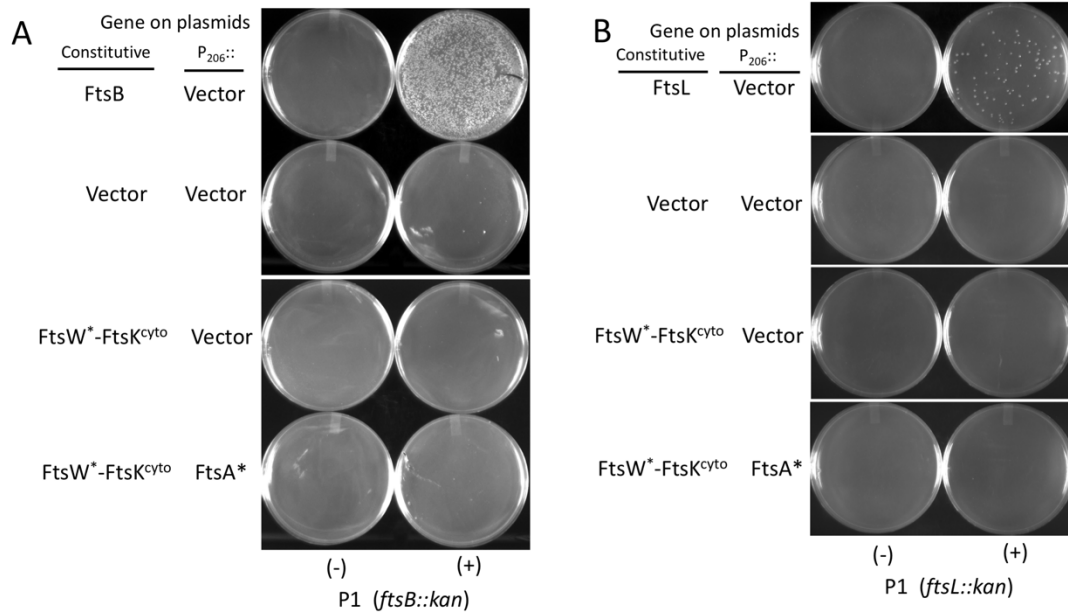

Fig. S6. Combining FtsA<sup>\*</sup> and FtsW<sup>\*</sup>-FtsK<sup>cyto</sup> cannot bypass *ftsB* or *ftsL*. P1 transduction was used to transduce *ftsB::kan* (SD439) or *ftsL::kan* (SD399) into MC4100 carrying control plasmids expressing *ftsB* (pKTP101 P<sub>tac</sub>::*ftsB*) or *ftsL* (pKTP100 P<sub>tac</sub>::*ftsL*) along with a vector or plasmids expressing *ftsW<sup>\*</sup>-ftsK<sup>cyto</sup>* (pND16\*) and a vector or *ftsA<sup>\*</sup>* (pSEB306\*/P<sub>206</sub>::*ftsA<sup>\*</sup>*). Transductants were selected on plates with 200 μM IPTG for 2 days at 30°C.

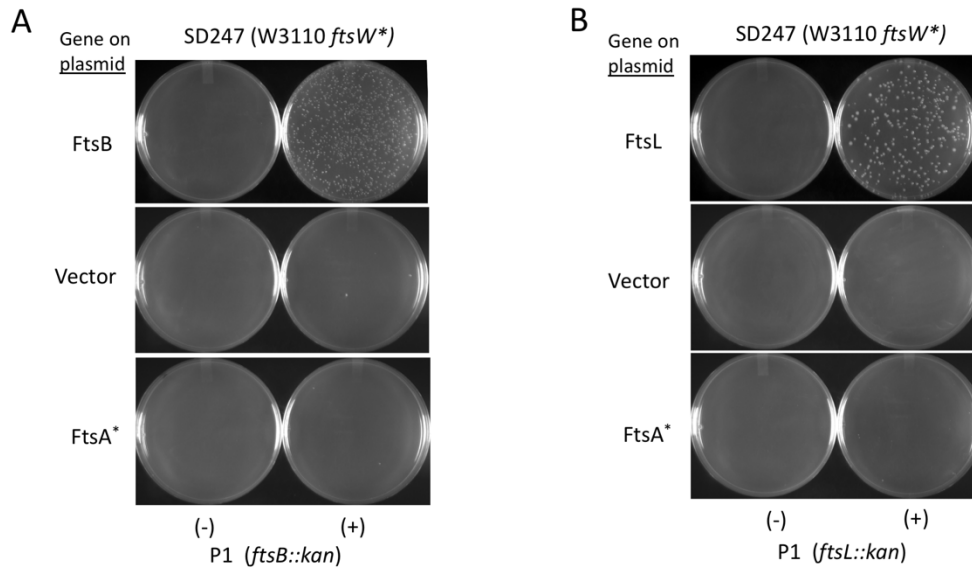

Fig. S7. Combining FtsA<sup>\*</sup> and FtsW<sup>\*</sup> cannot bypass *ftsB* or *ftsL*. P1 phage grown on strains containing *ftsB::kan* (SD439) or *ftsL::kan* (SD399) was used to transduce these alleles into SD247 (*ftsW*<sup>\*</sup>) containing plasmids expressing: (A) *ftsB* (pKTP101 P<sub>tac</sub>::*ftsB*) or (B) *ftsL* (pKTP100 P<sub>tac</sub>::*ftsL*), a vector or a plasmid expressing *ftsA*<sup>\*</sup> (pSEB306\* [P<sub>206</sub>::*ftsA*<sup>\*</sup>]). Transductants only emerged with the positive control plasmids. Transductants were selected on plates with 200 μM IPTG for 2 days at 30°C.



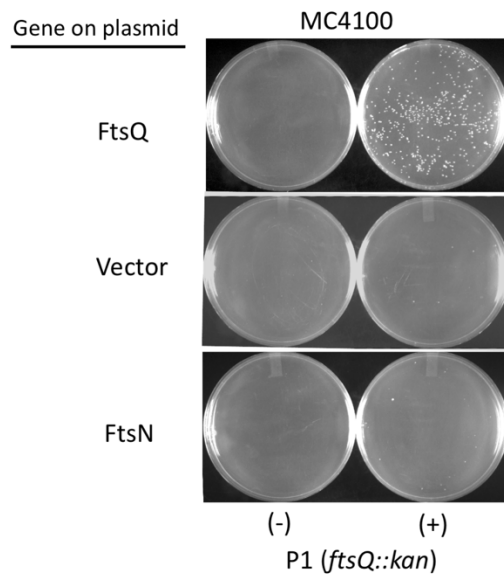

Fig. S8. Overexpression of *ftsN* cannot bypass *ftsQ*. P1 grown on JOE417 (*ftsQ14::kan/pBAD33-ftsQ*) was used to transduce MC4100 to kanamycin resistance. MC4100 contained pSEB468 ( $P_{syn135}::ftsQ$ ), a vector or pKD140 ( $P_{ftsN}::ftsN$ ). Whereas numerous colonies grew on the control plate (pSEB468), only sporadic colonies grew on the plates containing the vector or pKD140. These latter colonies grew poorly when re-streaked and were not studied further.

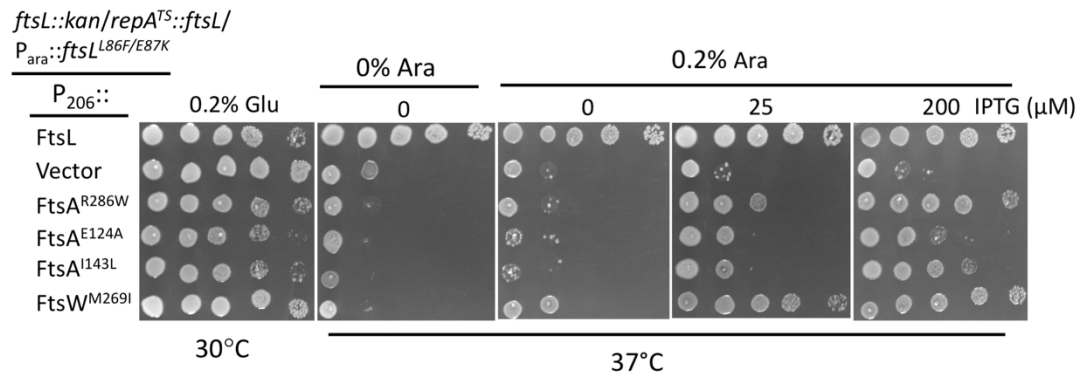

Fig. S9. Effect of *ftsA* alleles on the rescue of *ftsL*<sup>L86F/E87K</sup>. The ability of various *ftsA* alleles to rescue *ftsL*<sup>L86F/E87K</sup> was examined using strain PK4-1 (*ftsL::kan/pSC101<sup>ts</sup>ftsL*). This strain was transformed with compatible plasmids pSD296-2 (P<sub>ara</sub>::*ftsL*<sup>L86F/E87K</sup>) and derivatives of pSEB306 (P<sub>206</sub>::*ftsA*) carrying various alleles of *ftsA*. Controls contained a vector or a plasmid expressing a high level of *ftsL* (pKTP100 [P<sub>tac</sub>::*ftsL*]). The strains were spot tested on plates at 37°C to deplete *ftsL* and *ftsL*<sup>L86F/E87K</sup> was induced with arabinose and the *ftsA* alleles were induced with IPTG.

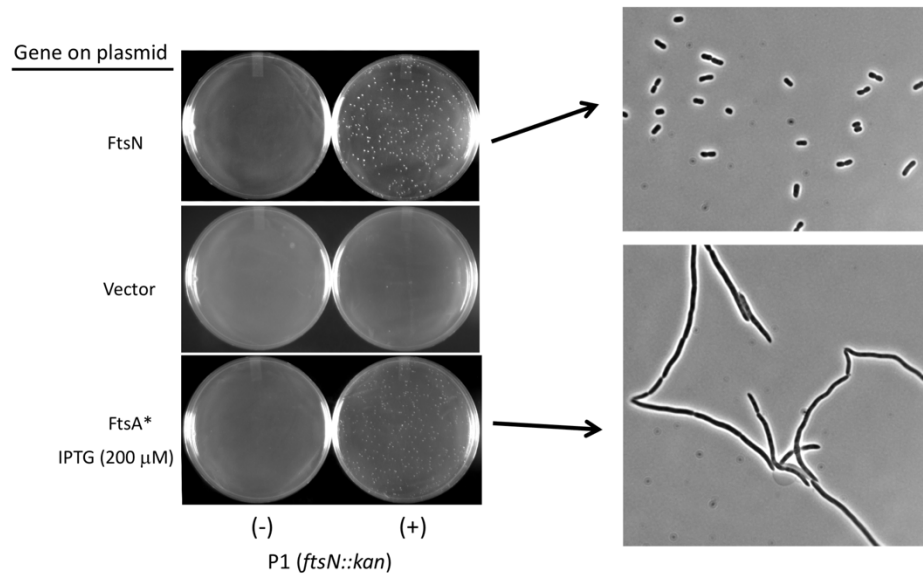

Fig. S10. Deletion of *ftsN* in the presence of *ftsA*<sup>\*</sup> leads to slow growing colonies. P1 prepared on CH34 (*ftsN::kan*/pCH201) was used to transduce W3110 to kanamycin resistance containing plasmid pKD140 (*P<sub>ftsN</sub>::ftsN*) or pSEB306\* (*P<sub>206</sub>::ftsA\**). The plates contained 200 μM IPTG and were incubated for 2 days at 30°C. The panel on the right contains cells taken from liquid cultures grown under the same conditions. As in Fig. S3, cells directly taken from LB plates were less elongated and displayed less chaining than those from liquid culture.

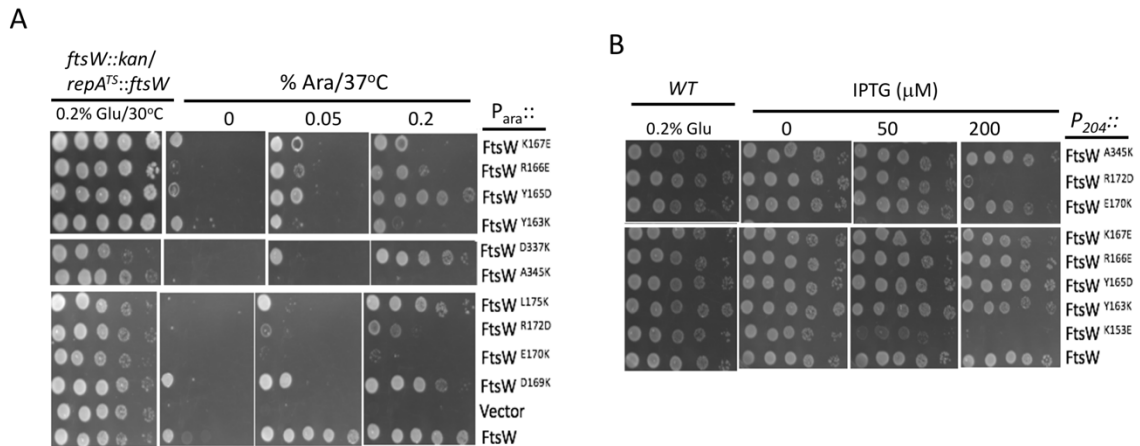

Fig. S11. Characterization of FtsW mutants. A) Complementation test. Spot tests were conducted to determine the ability of *ftsW* mutants to complement a FtsW depletion strain. To do this, derivatives of pDSW406 (*P<sub>ara</sub>::ftsW*) carrying various *ftsW* mutations were introduced into SD295 (*ftsW::kan/pSD256 [repA<sup>ts</sup> P<sub>syn135</sub>::ftsW]*) at 30°C. Colonies from the transformation were picked into 300 μl LB, serial diluted 10-fold, and 3 μl from each dilution was spotted on LB plates with increasing concentrations of arabinose. B) Dominant negative test of FtsW mutants. To test if the *ftsW* mutations were dominant negative, they were introduced into pSEB429 (*P<sub>204</sub>::ftsW*) (to achieve higher expression) and the resulting plasmids were transformed into W3110 *recA*. The *ftsW*<sup>Y165D</sup> mutation was included as a control as it complements a depletion strain and was not expected to be dominant negative. Colonies from the transformation were spotted on plates with increasing IPTG. One additional mutation (*ftsW*<sup>K153E</sup>) that altered a charged residue in TM4 was also included as a control. It was expected to be dominant negative (the corresponding residue in RodA is nonmutable (17)) and tests showed that it was.

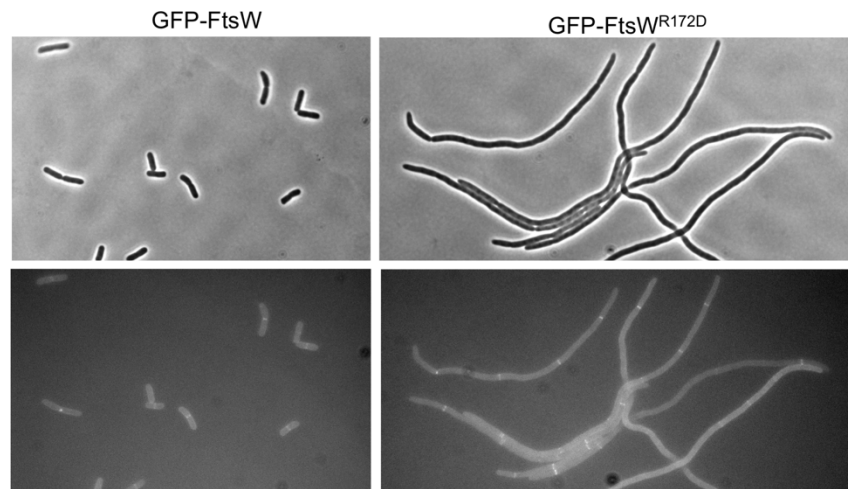

Fig. S12. GFP-FtsW<sup>R172D</sup> does not have a defect in localization. EC912 (*ftsW::kan/pDSW406 [P<sub>ara</sub>::ftsW]*) containing pDSW311 (P<sub>206</sub>::*gfp-ftsW*) or pDSW311-1 (P<sub>206</sub>::*gfp-ftsW<sup>R172D</sup>*) was grown to exponential phase in the presence of 0.2% arabinose at 30°C, centrifuged and resuspended in media without arabinose. After 2 hours IPTG was added at 1 mM and samples taken for photography 2 hour later.

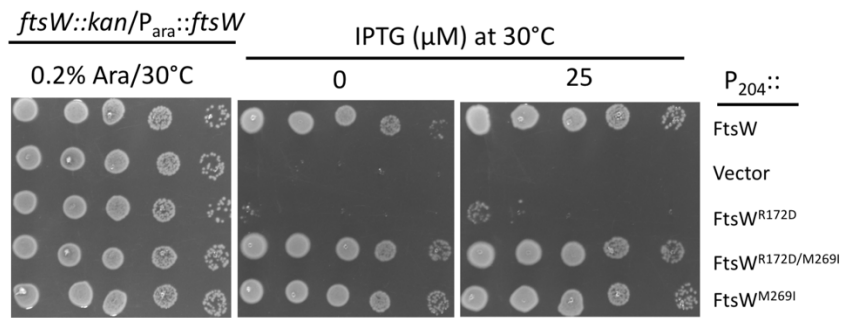

Fig. S13. *ftsW*\* is an intragenic suppressor of *ftsW*<sup>R172D</sup>. To test if the *ftsW*\* activation mutation could rescue *ftsW*<sup>R172D</sup>, EC912 (*ftsW::kan/pDSW406* (P<sub>ara</sub>::*ftsW*)) was transformed with derivatives of pSEB429 (P<sub>204</sub>::*ftsW*) carrying various alleles of *ftsW*. The transformants were tested on plates without arabinose (to deplete WT *ftsW*) and containing increasing amounts of IPTG. Note, basal expression of *ftsW* from pSEB429 (P<sub>204</sub>::*ftsW*) is sufficient to complement an *ftsW* depletion strain.

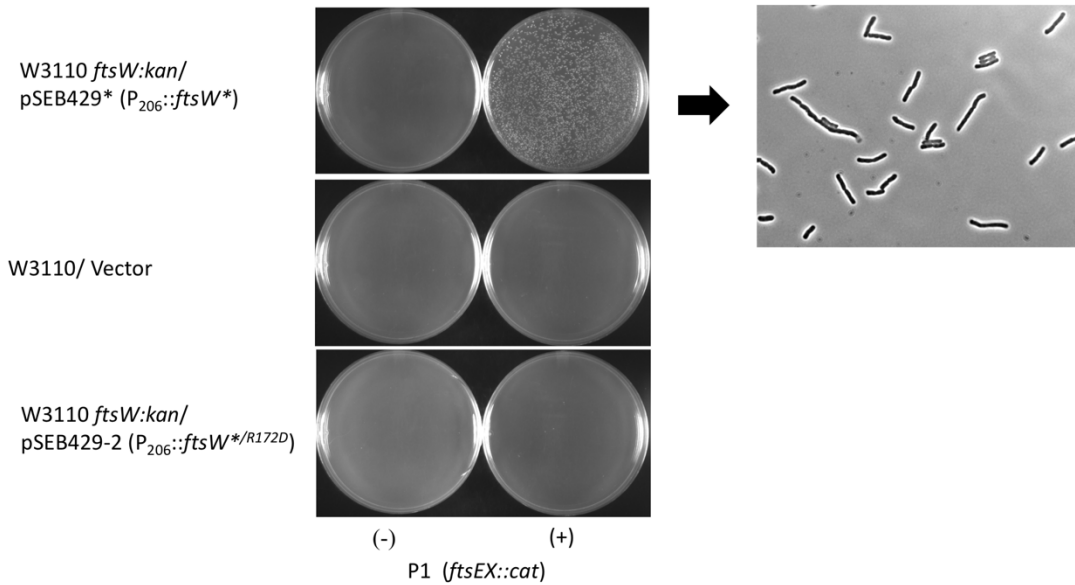

Fig. S14. *ftsEX::cat* can be transduced into *ftsW*\* but not *ftsW*<sup>*R172D*</sup>/\*. P1 grown on SD205 (*ftsEX::cat*) was used to transduce various derivatives of W3110 to chloramphenicol resistance. The stains included W3110 *ftsW::kan*/pSEB429-1 (P<sub>206</sub>::*ftsW*\*), W3110 (pDSW208) and W3110 *ftsW::kan*/pSEB429-3 (P<sub>206</sub>::*ftsW*\*/*R279E*).

Table S1. *E. coli* strains used in this study

| Strain       | Genotype                                                                                                                                                                    | Source or reference                                                                           |
|--------------|-----------------------------------------------------------------------------------------------------------------------------------------------------------------------------|-----------------------------------------------------------------------------------------------|
| BL155/pBL194 | TB28 <i>ftsB::kan</i> / pSC101<br>( <i>repA<sup>ts</sup></i> P <sub>syn135</sub> :: <i>gfp-ftsB</i> )                                                                       | (13)                                                                                          |
| BL156/pBL195 | TB28 <i>ftsL::kan</i> / pSC101<br>( <i>repA<sup>ts</sup></i> P <sub>syn135</sub> :: <i>gfp-ftsL</i> )                                                                       | (13)                                                                                          |
| BTH101       | F <sup>-</sup> , <i>cya-99</i> , <i>araD139</i> ,<br><i>galE15</i> , <i>galK16</i> , <i>rpsL1</i> ( <i>Str<sup>r</sup></i> ),<br><i>hsdR2</i> , <i>mcrA1</i> , <i>mcrB1</i> | (8)                                                                                           |
| CH34         | TB28 <i>ftsN::kan</i> /pCH201                                                                                                                                               | (2)                                                                                           |
| EC912        | W3110<br><i>ftsW::kan</i> /pDSW406                                                                                                                                          | (4)                                                                                           |
| JOE417       | MC4100 JOE309 (MC4100<br><i>ara</i> <sup>+</sup> )<br><i>ftsQE14::kan</i> /pBAD33- <i>ftsQ</i>                                                                              | (4)                                                                                           |
| PK3116       | W3110<br><i>ftsQE14::kan</i> /pBAD33- <i>ftsQ</i>                                                                                                                           | P1(JOE417) x W3110<br>(pBAD33- <i>ftsQ</i> ); select<br>Kan <sup>R</sup> with 0.2% Ara        |
| PK4-1        | W3110 <i>ftsL::kan</i> /pKTP108                                                                                                                                             | (9)                                                                                           |
| PK7          | W3110 <i>ftsN::kan</i> /<br>pSEB306* P <sub>206</sub> :: <i>ftsA</i> *)                                                                                                     | P1 (BL156) x SD247/<br>pSEB306*;<br>Select Kan <sup>R</sup> in the presence<br>of 200 μM IPTG |
| JS238        | MC1061 <i>malPp::lacI<sup>Q</sup></i><br><i>src::Tn10 recA1</i>                                                                                                             | (11)                                                                                          |
| MC4100       | F <sup>-</sup> <i>araD139Δ</i> ( <i>argF-lac</i> )U169<br><i>rspL150 relA1 flbB5301</i><br><i>fruA25 deoC1 ptsF25</i>                                                       | (11)                                                                                          |
| PB143/pCX41  | JK268 <i>ftsZ<sup>0</sup> recA::Tn10</i><br>pCX41 (cat <i>repA<sup>ts</sup></i> ) <i>ftsZ<sup>+</sup></i> )                                                                 | (14)                                                                                          |
| SD205        | W3110 <i>ftsEX::cat</i>                                                                                                                                                     | (15)                                                                                          |
| SD247        | W3110 <i>ftsW<sup>M269I</sup></i>                                                                                                                                           | (15)                                                                                          |
| SD264        | W3110 <i>leu::Tn10</i><br><i>ftsN::kan</i> /pBL154                                                                                                                          | (15)                                                                                          |
| SD292        | W3110 <i>ftsW::kan</i> /pSD257<br>( <i>aadA repA<sup>ts</sup></i> P <sub>syn135</sub> :: <i>ftsW</i> )                                                                      | P1 from EC912 x W3110/<br>pSD257; select Kan <sup>R</sup> at<br>30°C                          |
| SD295        | SD292 <i>recA::Tn10</i>                                                                                                                                                     | P1 (PB143) X SD292; select<br>Tet <sup>R</sup>                                                |



|                   |                                                                                             |                                                                                                                                                              |
|-------------------|---------------------------------------------------------------------------------------------|--------------------------------------------------------------------------------------------------------------------------------------------------------------|
| SD368             | W3110 <i>ftsB::kan/pSD255</i><br>(pSC101 <i>repA<sup>ts</sup> P<sub>syn35</sub>::ftsB</i> ) | W3110/ pSC101 <sup>ts</sup> <i>ftsB</i><br>P1(BL155/pBL194) X<br>W3110/pSD255; select for<br>Kan <sup>R</sup> on LB plates at 30 C<br>and test for TS growth |
| SD399             | W3110 <i>ftsL::kan/pSD256</i><br>(pSC101 <i>repA<sup>ts</sup> ftsL</i> )                    | P1 (BL156/pBL19 X<br>W3110/pSD256 and select<br>for Kan <sup>R</sup> on LB plates at<br>30°C and test for TS<br>growth                                       |
| SD439             | W3110 <i>ftsL::kan/pSD296</i>                                                               | Transform SD292with<br>pSD296 and passage at<br>37°C on arabinose                                                                                            |
| TB28              | MG1655, <i>lacIZYA&lt;&gt;frt</i>                                                           | (2)                                                                                                                                                          |
| W3110             | Wild type strain                                                                            | Laboratory collection                                                                                                                                        |
| W3110 <i>recA</i> | W3110 <i>recA56 Tn10</i>                                                                    | P1(PB143) X W3110, select<br>Tet <sup>R</sup> and screen UV<br>sensitivity                                                                                   |
| WM2355            | W3110 <i>ftsN::kan/pSC101</i><br><i>repA<sup>ts</sup> ftsN</i>                              | (16)                                                                                                                                                         |

Table S2. Plasmids used in this study

| Plasmid     | Genotype                                                              | Origin   | Source reference or |
|-------------|-----------------------------------------------------------------------|----------|---------------------|
| pBAD33-ftsQ | <i>cat P<sub>ara</sub>::ftsQ</i>                                      | pACYC184 | (1)                 |
| pBL154      | <i>aadA P<sub>syn135</sub>::ftsN</i>                                  | pSC101   | (2)                 |
| pCH201      | <i>bla lacI<sup>q</sup> P<sub>lac</sub>::gfp-ftsN</i>                 | ColE1    | (2)                 |
| pDSW208     | <i>bla lacI<sup>q</sup> P<sub>204</sub>::gfp</i>                      | ColE1    | (3)                 |
| pDSW209     | <i>bla lacI<sup>q</sup> P<sub>206</sub>::gfp</i>                      | ColE1    | (3)                 |
| pDSW210     | <i>bla lacI<sup>q</sup> P<sub>206</sub>::gfp</i>                      | ColE1    | (3)                 |
| pDSW311     | <i>bla lacI<sup>q</sup> P<sub>206</sub>::gfp-ftsW</i>                 | ColE1    | (4)                 |
| pDSW311-1   | <i>bla lacI<sup>q</sup> P<sub>206</sub>::gfp-ftsW<sup>R172D</sup></i> | ColE1    | This work           |
| pDSW406     | <i>cat P<sub>ara</sub>::ftsW</i>                                      | ColE1    | (4)                 |
| pJF118EH    | <i>bla lacI<sup>q</sup> P<sub>tac</sub>::vector</i>                   | ColE1    | (5)                 |
| pKD123      | <i>cat repA<sup>ts</sup> P<sub>ftsN</sub>::ftsN</i>                   | pSC101   | (6)                 |
| pKD140      | <i>bla P<sub>ftsN</sub>::ftsN</i>                                     | ColE1    | (6)                 |
| pKD146      | <i>bla malG<sup>1-33</sup>-ftsN<sup>46-319</sup></i>                  | ColE1    | (7)                 |
| pKT25       | <i>kan Plac-T25-MCS</i>                                               | p15A     | (8)                 |
| pKT25-ftsW  | <i>kan Plac-T25-ftsW</i>                                              | p15A     | (9)                 |
| pKT25-ftsW* | <i>kan Plac-T25-ftsW*</i>                                             | p15A     | (9)                 |
| pKTP100     | <i>bla lacI<sup>q</sup> P<sub>tac</sub>::ftsL</i>                     | ColE1    | (9)                 |
| pKTP100*    | <i>bla lacI<sup>q</sup> P<sub>tac</sub>::ftsL<sup>L86F/E87K</sup></i> | ColE1    | (9)                 |
| pKTP101     | <i>bla lacI<sup>q</sup> P<sub>tac</sub>::ftsB</i>                     | ColE1    | (9)                 |
| pKTP107     | <i>cat P<sub>ara</sub>::ftsL<sup>Δcyto</sup></i>                      | pACYC184 | (9)                 |
| pKTP108     | <i>aadA repA<sup>ts</sup> P<sub>syn135</sub>::ftsL</i>                | pSC101   | (9)                 |
| pND16       | <i>aadA P<sub>ftsK</sub>::ftsW-ftsK<sup>179-1329(cyto)</sup></i>      | pSC101   | (10)                |
| pND16*      | <i>aadA P<sub>ftsK</sub>::ftsW*-ftsK<sup>179-1329</sup></i>           | pSC101   | This work           |
| pSD255      | <i>aadA repA<sup>ts</sup> P<sub>syn135</sub>::ftsB</i>                | pSC101   | This work           |
| pSD256      | <i>aadA repA<sup>ts</sup> P<sub>syn135</sub>::ftsL</i>                | pSC101   | (8)                 |
| pSD257      | <i>aadA repA<sup>ts</sup> P<sub>syn135</sub>::ftsW</i>                | pSC101   | This work           |
| pSD257*     | <i>aadA repA<sup>ts</sup> P<sub>syn135</sub>::ftsW*</i>               | pSC101   | This work           |
| pSD295      | <i>cat pBAD33 P<sub>ara</sub>::ftsB</i>                               | pACYC184 | (9)                 |
| pSD295-54   | <i>cat pBAD33 P<sub>ara</sub>::ftsB<sup>1-54</sup></i>                | pACYC184 | This work           |
| pSD296      | <i>cat pBAD33 P<sub>ara</sub>::ftsL</i>                               | pACYC184 | (9)                 |
| pSD296-2    | <i>cat pBAD33 P<sub>ara</sub>::ftsL<sup>L86F/E87K</sup></i>           | pACYC184 | (9)                 |
| pSEB306     | <i>bla lacI<sup>q</sup> P<sub>206</sub>::ftsA</i>                     | ColE1    | (11)                |
| pSEB306*    | <i>bla lacI<sup>q</sup> P<sub>206</sub>::ftsA*</i>                    | ColE1    | (11)                |
| pSEB417     | <i>bla lacI<sup>q</sup> P<sub>204</sub>::ftsN</i>                     | ColE1    | (11)                |
| pSEB428     | <i>bla lacI<sup>q</sup> P<sub>204</sub>::ftsEX</i>                    | ColE1    | (11)                |
| pSEB429     | <i>bla lacI<sup>q</sup> P<sub>204</sub>::ftsW</i>                     | ColE1    | (11)                |
| pSEB429*    | <i>bla lacI<sup>q</sup> P<sub>204</sub>::ftsW*</i>                    | ColE1    | This work           |

|                               |                                                                        |        |           |
|-------------------------------|------------------------------------------------------------------------|--------|-----------|
| pSEB429-2                     | <i>bla lacI<sup>q</sup> P<sub>204</sub>::ftsW<sup>*/R172D</sup></i>    | ColE1  | This work |
| pSEB453                       | <i>bla P<sub>ftsN</sub>::malG<sup>1-33</sup>-ftsN<sup>46-319</sup></i> | ColE1  | This work |
| pSEB468                       | <i>aadA P<sub>syn135</sub>::ftsQ</i>                                   | pSC101 | This work |
| pUT18C                        | <i>bla Plac-T18-MCS</i>                                                | ColE1  | (8)       |
| pUT18-ftsA                    | <i>bla Plac-T18-ftsA</i>                                               | ColE1  | (12)      |
| pUT18-ftsA <sup>R300E</sup>   | <i>bla Plac-T18-ftsA<sup>R300E</sup></i>                               | ColE1  | (12)      |
| pUT18-ftsA <sup>R300E/*</sup> | <i>bla Plac-T18-ftsA<sup>R300E/*</sup></i>                             | ColE1  | (12)      |
| pUT18C-ftsL                   | <i>bla Plac-T18-ftsL</i>                                               | ColE1  | (9)       |

Table S3. Rescue of FtsW mutants by FtsL\*\* and FtsA\*.

| FtsW mutant | Complementation | Dominant negative <sup>2</sup> | Rescued by FtsL** | Rescued by FtsA* |
|-------------|-----------------|--------------------------------|-------------------|------------------|
| Y163K       | -               | +                              | +                 | -                |
| V165D       | +               | -                              | NA <sup>1</sup>   | NA               |
| R166E       | -               | -                              | NA                | NA               |
| K167E       | -               | +                              | +                 | +                |
| D169K       | +               | NA                             | NA                | NA               |
| E170K       | -               | ++                             | +                 | +                |
| R172D       | -               | +++                            | +                 | -                |
| L175K       | +               | NA                             | NA                | NA               |
| D337K       | +               | NA                             | NA                | NA               |
| A345K       | -               | -                              | NA                | NA               |

<sup>1</sup>Not applicable;

<sup>2</sup> +++, inhibition of colony formation; ++, slight inhibition of colony formation with filamentous cells; +, filamentous cells; -, no filamentous cells

Table S4. List of the primers used in this study

| Primer Name <sup>a</sup>    | Sequence                                                           |
|-----------------------------|--------------------------------------------------------------------|
| <i>ftsA</i> -E124A-F        | 5'-CGTGTGCGCGATGCGCATCGTGTGCTGCATGTGA-3'                           |
| <i>ftsA</i> -E124A-R        | 5'-TCACATGCAGCACACGATGCGCATCGCGCACACG-3'                           |
| <i>ftsA</i> -I143L-F        | 5'-CTATCAGGAAGGGCTCAAGAATCCGGTAGGACT-3'                            |
| <i>ftsA</i> -I143L-R        | 5'-AGTCCTACCGATTCTTGAGCCCTTCCTGATAG-3'                             |
| <i>ftsA</i> -R286W-F        | 5'-GTCGTCCGCCATGGAGTCTGCAACGTCAGACAC-3'                            |
| <i>ftsA</i> -R286W-R        | 5'-GTGTCTGACGTTGCAGACTCCATGGCGGACGAC-3'                            |
| <i>ftsB</i> -HindIII-F      | 5'-TACTAAGCTTGGGCTAATTTGTAC-3'                                     |
| <i>ftsB</i> -EcoRI-R        | 5'-TCGGGAATTCAGGACTTATGGCAATG-3'                                   |
| <i>ftsB</i> -XbaI-F         | 5'-TCCTCTAGAGCCGTTTTTCAGGGGGCAGGATGGGTAAACTAACGC<br>TGCTGTTGC-3'   |
| <i>ftsB</i> -HindIII-R      | 5'-CAGCCAAGCTTTTATCGATTGTTTTGCCCG-3'                               |
| <i>ftsB</i> -AE55,56 Stop-F | 5'-CGATCAACTTTTTTAGTAAATTGACGATCTCAATGGC-3'                        |
| <i>ftsB</i> -AE55,56 Stop-R | 5'-GCCATTGAGATCGTCAATTTACTAAAAAGTTGATCG-3'                         |
| <i>ftsB</i> -YR85,86 Stop-F | 5'-AGGCCGGGCGAAACTTTTTAGTGACTGGTGCCTGA-3'                          |
| <i>ftsB</i> -YR85,86 Stop-R | 5'-TCAGGCACCAGTCACTAAAAAGTTTCGCCCCGCCT-3'                          |
| <i>ftsL</i> -HindIII-F      | 5'-TACTAAGCTTCGTATTGTGAAACG-3'                                     |
| <i>ftsL</i> -EcoRI-R        | 5'-CGGGAATTCAGAGAACGCATGTC-3'                                      |
| <i>ftsL</i> -L86F/E87K-F    | 5'-GCAACCTGATCTTTAAAGAGAATGCGCTCGGCGACCAT-3'                       |
| <i>ftsL</i> -L86F/E87K-R    | 5'-ATGGTCGCCGAGCGCATTCTCTTTAAAGATCAGGTTGC-3'                       |
| <i>ftsL</i> -E88K/G92D-F    | 5'-CTGATCCTTGAAAAGAATGCGCTCGACGACCATAG-3'                          |
| <i>ftsL</i> -E88K/G92D-R    | 5'-CTATGGTCGTCGAGCGCATTCTTTCAAGGATCAG-3'                           |
| <i>ftsL</i> -IL85,86 stop-F | 5'-GGCGCAACCTGTAGTAGGAAGAGAATGCGCTCGGCG-3'                         |
| <i>ftsL</i> -IL85,86 stop-R | 5'-CGCCGAGCGCATTCTCTTCTACTACAGGTTGCGCC-3'                          |
| <i>ftsL</i> -AL90,91 stop-F | 5'-TCCTTGAAGAGAATTAGTAGGGCGACCATAGCC-3'                            |
| <i>ftsL</i> -AL90,91 stop-R | 5'-GGCTATGGTCGCCCTACTAATTCTCTTCAAGGA-3'                            |
| <i>ftsQ</i> -XbaI-F         | 5'-TACCTCTAGATTTAAGAAGGAGATATACATATGTCGCAGGCTGCTCT<br>GAACACGCG-3' |
| <i>ftsQ</i> -HindIII-R      | 5'-TACTAAGCTTTATCATTGTTGTTCTGCCT-3'                                |
| <i>ftsQ</i> -(-55)          | 5'-GCAGGTATGAGCTTCTCGCAGTTGGTAGTACGAATTCTG-3'                      |
| <i>ftsQ</i> -(+65)          | 5'-TAAAGCGGCAACCTTCGCGGTACCAATCTCCAGTCTAC-3'                       |
| <i>ftsQ</i> -L6E FW         | 5'-CTAATATGTCGCAGGCTGCTGAGAACACGCGAAACAGC-3                        |
| <i>ftsQ</i> -HindIII        | 5'-CGTAAGCTTTATCATTGTTGTTCTGCCTGTGC-3'                             |
| <i>ftsW</i> -HindIII-F      | 5'-TACTAAGCTTCGGTCTGTGACGGCG-3'                                    |
| <i>ftsW</i> -EcoRI-R        | 5'-CGGGAATTCACGCAGACCAGAGATAC-3'                                   |
| <i>ftsW</i> -Y163K-F        | 5'-TTTTGCTATATCGCCAACAACTGGTGCCTAAAGG-3'                           |
| <i>ftsW</i> -Y163K-R        | 5'-CTTTACGCACCAGTTTGTGGCGATATAGCAAAA-3'                            |
| <i>ftsW</i> -V165D-F        | 5'-TATATCGCCAACCTATCTGGACCCTAAAGGCGACG-3'                          |
| <i>ftsW</i> -V165D-R        | 5'-CGTCGCCTTTACGGTCCAGATAGTTGGCGAT-3'                              |
| <i>ftsW</i> -R166E-F        | 5'-CAACTATCTGGTGGAAAAAGGCGACGAAGTACG-3'                            |
| <i>ftsW</i> -R166E-R        | 5'-GTACTTCGTCGCCTTTTCCACCAGATAGTTG-3'                              |
| <i>ftsW</i> -K167E-F        | 5'-CAACTATCTGGTGCCTGAAGGCGACGAAGTACG-3'                            |
| <i>ftsW</i> -K167E-R        | 5'-CGTACTTCGTCGCCTTACGCACCAGATAGTTG-3'                             |

|                      |                                           |
|----------------------|-------------------------------------------|
| <i>ftsW</i> -D169K-F | 5'-TCTGGTGCGTAAAGGCAAAGAAGTACGTAATAACC-3' |
| <i>ftsW</i> -D169K-R | 5'-GGTTATTACGTACTTCTTTGCCTTTACGCACCAGA-3' |
| <i>ftsW</i> -E170K-F | 5'- TGGTGCGTAAAGGCGACAAAGTACGTAATAACCT-3' |
| <i>ftsW</i> -E170K-R | 5'- GCGCAGGTTATTACGTACTTTGTCGCCTTTACGC-3' |
| <i>ftsW</i> -R172D-F | 5'- AGGCGACGAAGTAGATAATAACCTGCGCGGCTTC-3' |
| <i>ftsW</i> -R172D-R | 5'- AGGAAGCCGCGCAGGTTATTATCTACTTCGT-3'    |
| <i>ftsW</i> -L175K-F | 5'-GACGAAGTACGTAATAACAAGCGCGGCTTCCTG-3'   |
| <i>ftsW</i> -L175K-R | 5'- CAGGAAGCCGCGCTTGTATTACGTACTTCGTC-3'   |
| <i>ftsW</i> -D337K-F | 5'- GCATTAGAAATTAACACCGTTTTTCCGGTTTTTC-3' |
| <i>ftsW</i> -A345K-F | 5'- TTTTCCGGTTTTCTCAAATGTTCTATTGGCATC-3'  |
| <i>ftsW</i> -A345K-R | 5'- GATGCCAATAGAACATTTGAGAAAACCGGAAAA-3'  |
| <i>ftsW</i> -M269I-F | 5'-CGCAATCGCTGATCGCGTTTGGTCGCGGCGAACTT-3' |

<sup>a</sup>Primers used for mutagenesis come in pairs (F-forward, R-reverse) and are named according to the amino acid substitution or the position at which the stop codons were introduced (two stop codons in tandem).

## SI References

1. Goehring NW, Petrovska I, Boyd D, & Beckwith J (2007) Mutants, suppressors, and wrinkled colonies: mutant alleles of the cell division gene *ftsQ* point to functional domains in FtsQ and a role for domain 1C of FtsA in divisome assembly. *J Bacteriol* 189(2):633-645.
2. Gerding MA, *et al.* (2009) Self-enhanced accumulation of FtsN at Division Sites and Roles for Other Proteins with a SPOR domain (DamX, DedD, and RlpA) in *Escherichia coli* cell constriction. *J Bacteriol* 191(24):7383-7401.
3. Weiss DS, Chen JC, Ghigo JM, Boyd D, & Beckwith J (1999) Localization of FtsI (PBP3) to the septal ring requires its membrane anchor, the Z ring, FtsA, FtsQ, and FtsL. *J Bacteriol* 181(2):508-520.
4. Mercer KL & Weiss DS (2002) The *Escherichia coli* cell division protein FtsW is required to recruit its cognate transpeptidase, FtsI (PBP3), to the division site. *J Bacteriol* 184(4):904-912.
5. Furste JP, *et al.* (1986) Molecular cloning of the plasmid RP4 primase region in a multi-host-range *tacP* expression vector. *Gene* 48(1):119-131.
6. Dai K, Xu Y, & Lutkenhaus J (1993) Cloning and characterization of *ftsN*, an essential cell division gene in *Escherichia coli* isolated as a multicopy suppressor of *ftsA12(Ts)*. *J Bacteriol* 175(12):3790-3797.
7. Dai K, Xu Y, & Lutkenhaus J (1996) Topological characterization of the essential *Escherichia coli* cell division protein FtsN. *J Bacteriol* 178(5):1328-1334.
8. Karimova G, Ullmann A, & Ladant D (2001) Protein-protein interaction between *Bacillus stearothermophilus* tyrosyl-tRNA synthetase subdomains revealed by a bacterial two-hybrid system. *J Mol Microbiol Biotechnol* 3(1):73-82.
9. Park KT, Du S, & Lutkenhaus J (2020) Essential Role for FtsL in Activation of Septal Peptidoglycan Synthesis. *mBio* 11(6).
10. Dubarry N, Possoz C, & Barre FX (2010) Multiple regions along the *Escherichia coli* FtsK protein are implicated in cell division. *Mol Microbiol* 78(5):1088-1100.
11. Pichoff S, Du S, & Lutkenhaus J (2015) The bypass of ZipA by overexpression of FtsN requires a previously unknown conserved FtsN motif essential for FtsA-FtsN interaction supporting a model in which FtsA monomers recruit late cell division proteins to the Z ring. *Mol Microbiol* 95(6):971-987.
12. Busiek KK, Eraso JM, Wang Y, & Margolin W (2012) The early divisome protein FtsA interacts directly through its 1c subdomain with the cytoplasmic domain of the late divisome protein FtsN. *J Bacteriol* 194(8):1989-2000.
13. Liu B, Persons L, Lee L, & de Boer PA (2015) Roles for both FtsA and the FtsBLQ subcomplex in FtsN-stimulated cell constriction in *Escherichia coli*. *Mol Microbiol* 95(6):945-970.
14. Raskin DM & de Boer PA (1999) Rapid pole-to-pole oscillation of a protein required for directing division to the middle of *Escherichia coli*. *Proc Natl Acad Sci U S A* 96(9):4971-4976.

15. Du S, Pichoff S, & Lutkenhaus J (2016) FtsEX acts on FtsA to regulate divisome assembly and activity. *Proc Natl Acad Sci U S A* 113(34):E5052-5061.
16. Bernard CS, Sadasivam M, Shiomi D, & Margolin W (2007) An altered FtsA can compensate for the loss of essential cell division protein FtsN in Escherichia coli. *Mol Microbiol* 64(5):1289-1305.
17. Meeske AJ, *et al.* (2016) SEDS proteins are a widespread family of bacterial cell wall polymerases. *Nature* 537(7622):634-638.
